# Supplementary material for: Simple, Low-Cost Fabrication of Highly Uniform and Reproducible SERS Substrates Composed of Ag–Pt Nanoparticles
Source: Nanomaterials (Basel). 2018 May 15;8(5):331. doi: 10.3390/nano8050331 (PMC5977345; doi:10.3390/nano8050331)
Supplement: Supplementary file 1 [file nanomaterials-08-00331-s001.pdf]

# **Simple, low-cost fabrication of highly uniform and reproducible SERS substrates composed of Ag-Pt nanoparticles**

Tao Wang, Juhong Zhou\* and Yan Wang

*Provincial Key Laboratory of Functional Coordination Compounds and Nanomaterials, School of*

*Chemistry and Chemical Engineering, Anqing Normal University, Anqing, 246001, P. R. China*

## **1. Characterization**

The morphologies of the samples were performed on a Zeiss Supra 55 field scanning electron microscopy (SEM) operating in high vacuum mode at 10 kV accelerating voltages. The Energy-dispersive X-ray spectrometry (EDS) analysis was carried out on a FEI-quanta 200F SEM with acceleration voltage of 30 kV. The surface state of the as-prepared SERS substrate was studied by XPS measurement (Kratos AXIS UltraDLD ultrahigh vacuum surface analysis system) with Al K $\alpha$  radiation (1486 eV) as probe. The obtained final spectra were calibrated to the adventitious carbon C 1s peak at 284.6 eV. The deconvolution of the high-resolution spectra was performed using the XPSPEAK41 program, in which an adjustment of the peaks was considered using peak fitting with Gaussian-Lorentzian peak shape and Shirley type background subtraction. The surface element composition of sample were calculated based on the peak areas from high-resolution XPS spectra and the relative sensitivity factors. The relative sensitivity factors were selected from the Scofield element library in CasaXPS.

## **2. SERS measurement**

Both the normal Raman spectrum and SERS spectra were collected using an HR 800 Raman spectroscopy (J Y, France) equipped with a synapse CCD detector and a confocal

Olympus microscope. The 600 g/mm gratings and a 633 nm He-Ne laser with a power of about 20 mW were used in the spectrograph. All the spectra were obtained using LMPlanFl 50 $\times$ , 0.5 numerical-aperture objective Lens (lens with the long focal length) with an accumulation time of 1 s.

The SERS measurements were carried out as follows. The Ge wafer grafted with Ag-Pt NPs was placed in a quartz cell with a quartz window. The cell was filled up with 100  $\mu$ L  $1 \times 10^{-8}$  M R6G aqueous solution. During the SERS detection, the laser was focused on the Ag-Pt NPs through the quartz window.

### 3. The high magnification SEM images of Ag-Pt nanoparticles grafted on the Ge wafer

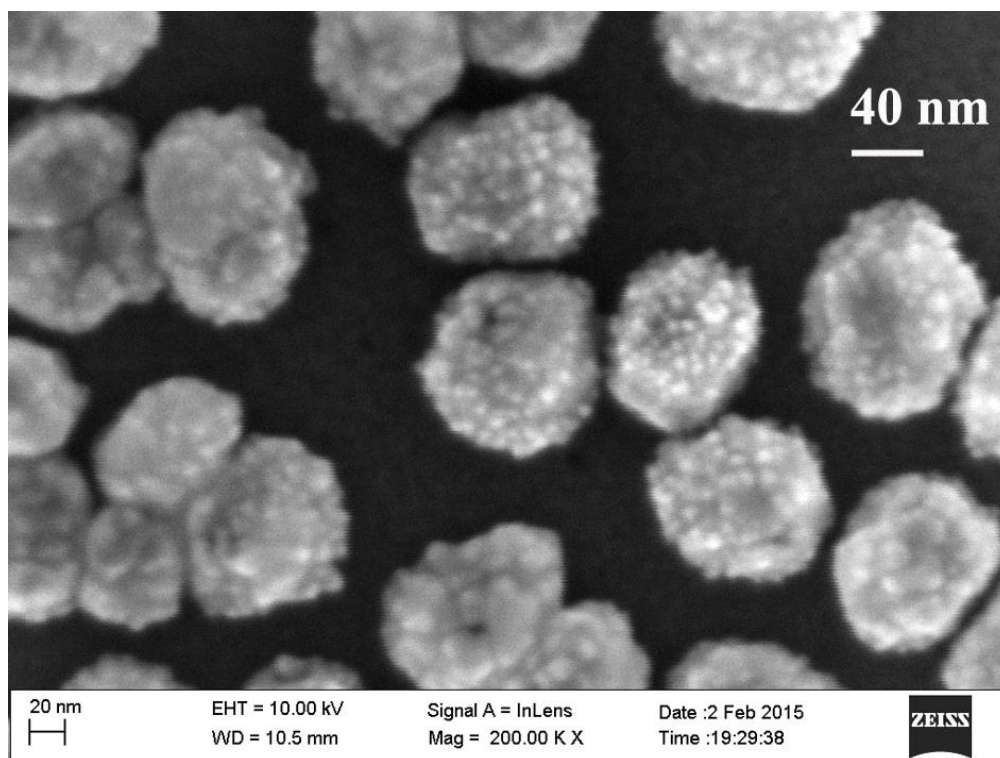

Figure S1. The high magnification SEM images of Ag-Pt nanoparticles grafted on the Ge wafer.

### 4. The EDS spectra of the Ag nanoparticle in the Ag-Pt/ Ge substrate

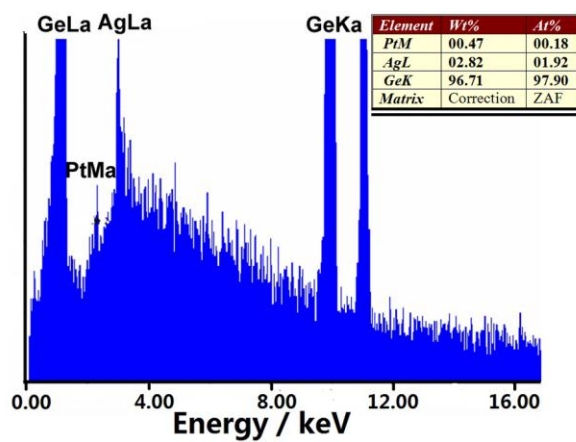

Figure S2. The EDS spectra of the the Ge wafer grown with Ag-Pt nanoparticles.

## 5. The normal Raman spectrum of 0.01 M R6G methanol solution

Fig. S3 shows the characteristics of the Raman spectra of 0.01 M R6G methanol solution.

The C-C stretching vibration bending mode is  $1181\text{ cm}^{-1}$ . The bands at 1366, 1511, 1580, and  $1654\text{ cm}^{-1}$  are assigned to the aromatic C-C stretching modes.

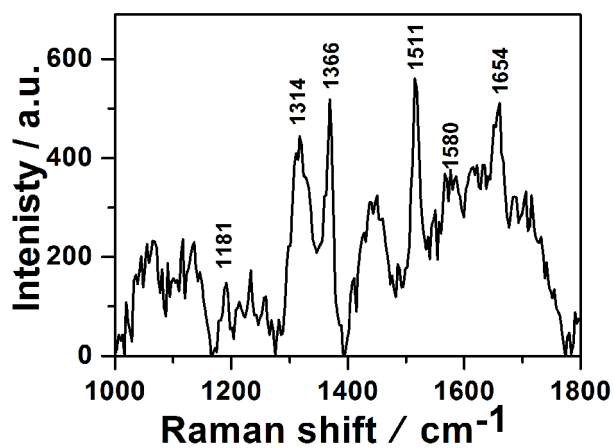

Figure S3. The normal Raman spectrum of 0.01 M R6G methanol solution.

6. The intensities of the major peaks in the 100 SERS spectra of R6G solution ( $1 \times 10^{-8}$  M).

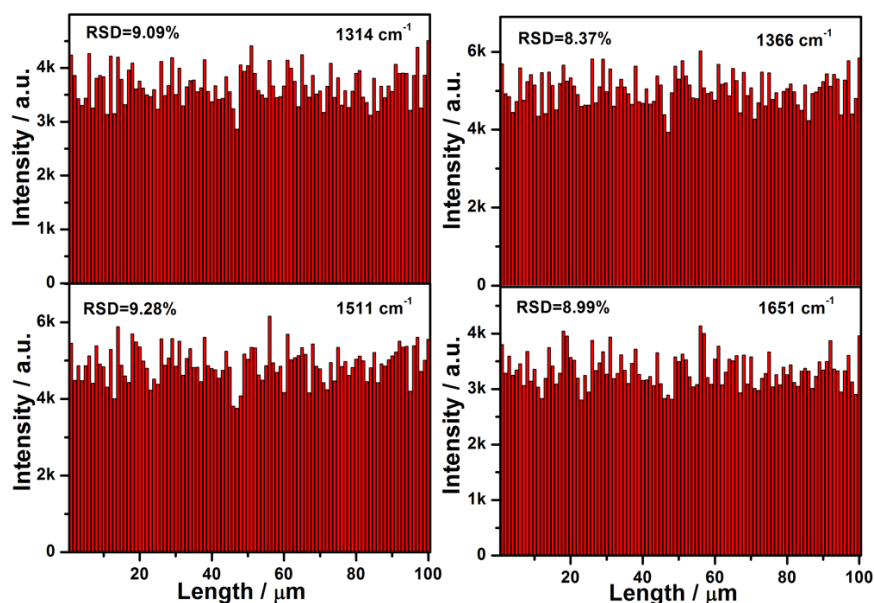

**Figure S4.** The intensities of the major peaks in the 100 SERS spectra of R6G solution ( $1 \times 10^{-8}$  M).

7. Histograms of normalized Raman intensities of R6G ( $1 \times 10^{-8}$  M) on Ag-Pt NPs/Ge SERS substrate

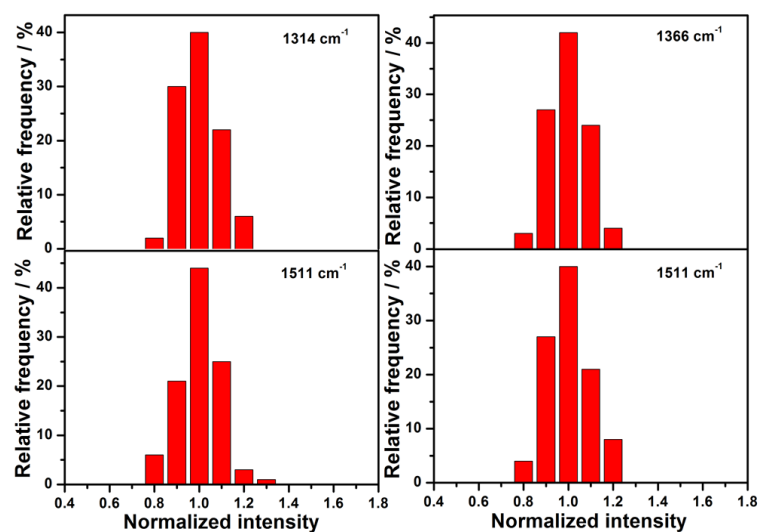

**Figure S5.** Histograms of normalized Raman intensities of R6G ( $1 \times 10^{-8}$  M) on Ag-Pt NPs/Ge SERS substrate.

### 8. EF calculation of the as-prepared Ag-Pt NPs/Ge substrate:

The average SERS EF was calculated according to the formula:

$$EF = \frac{I_{SERS} N_0}{I_0 N_{SERS}}$$

where  $I_0$  and  $I_{SERS}$  are the peak intensity of the Raman measurement with 0.01 M R6G solution and SERS measurement with  $1 \times 10^{-8}$  M R6G solution, respectively;  $N_0$  and  $N_{SERS}$  are the number of R6G molecules in the scattering volume for the Raman measurement and SERS measurement, respectively.

$$N_0 = n_0 N_A = C_0 V_0 N_A ;$$

$$N_{SERS} = n_{SERS} N_A = C_{SERS} V_{SERS} N_A ;$$

$$\text{So, } EF = \frac{I_{SERS} N_0}{I_0 N_{SERS}} = \frac{I_{SERS} C_0 V_0 N_A}{I_0 C_{SERS} V_{SERS} N_A} = \frac{I_{SERS} C_0}{I_0 C_{SERS}} = \frac{4922 \times 1 \times 10^{-2}}{540 \times 1 \times 10^{-8}} = 9.1 \times 10^6 ;$$

where  $n_0$  and  $n_{SERS}$  are the amount substance of R6G molecules in the scattering volume;  $V_0$  and  $V_{SERS}$  are the scattering volume ( $V_0 = V_{SERS}$ );  $C_0$  and  $C_{SERS}$  are the concentration of R6G solution. The subscripts 0 and SERS represent Raman measurement and SERS measurement, respectively.  $A$  is the area of laser spot;  $h$  is the laser spot depth of focus;  $N_A$  is Avogadro constant.

**10. The intensities of the major peaks in the 100 SERS spectra of  $1 \times 10^{-7}$  M CV solution**

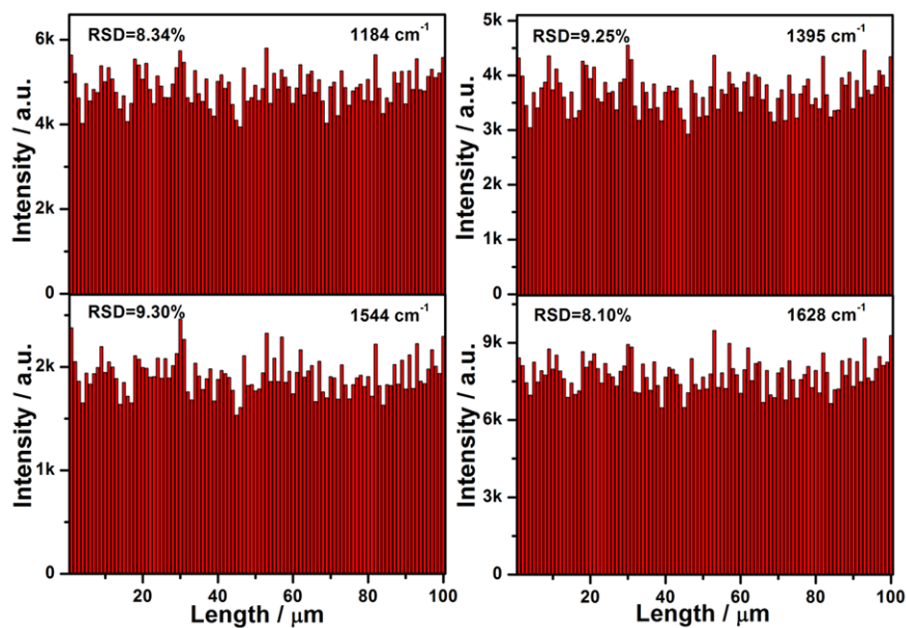

**Figure S6.** The intensities of the major peaks in the 100 SERS spectra of  $1 \times 10^{-7}$  M CV solution.

**10. Histograms of normalized Raman intensities of CV ( $1 \times 10^{-7}$  M) on Ag-Pt NPs/Ge SERS substrate**

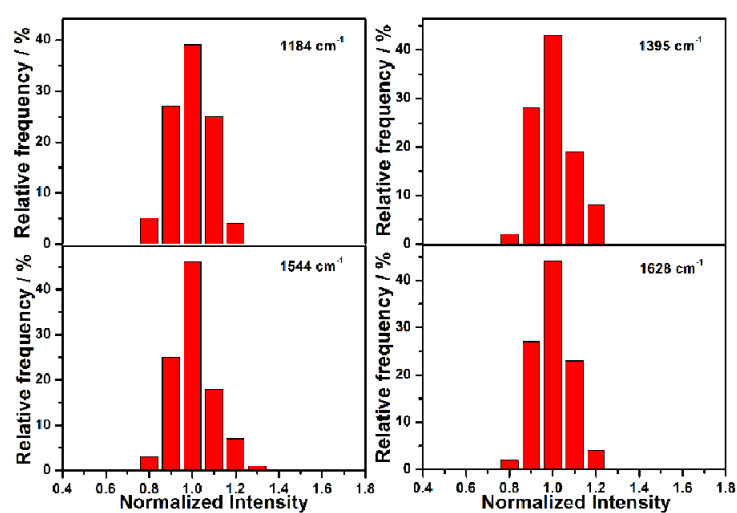

**Figure S7.** Histograms of normalized Raman intensities of CV ( $1 \times 10^{-7}$  M) on Ag-Pt NPs/Ge SERS substrate.

11. Histograms of normalized Raman intensities of R6G ( $1 \times 10^{-8}$  M) on Ag-Pt NPs/Ge SERS substrate after a one-year storage in atmospheres at room temperature.

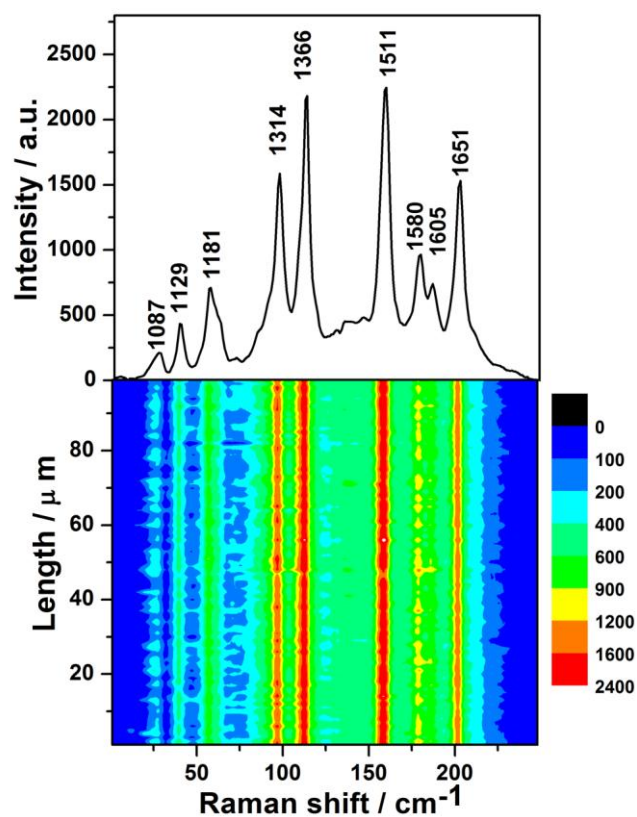

Figure S8. (Upper) the SERS spectrum of  $1 \times 10^{-8}$  M R6G solution on Ag-Pt NPs/Ge SERS substrate after a one-year storage in atmospheres at room temperature. (Lower) the SERS contour from line mapping of 100 spots.
